# Supplementary material for: External oxidant-free cross-coupling of arylcopper and alkynylcopper reagents leading to arylalkyne
Source: Royal Society of Chemistry journal article supplement (doi:10.1039/c7ra03348f), 2017-01-01
Supplement: c7ra03348f1.pdf [file c7ra03348f1.pdf]

## Supporting information

for

External Oxidant-free Cross-coupling of Arylcopper and  
Alkynylcopper reagents Leading to Arylalkyne

Sheng Wang<sup>†</sup>, Yaosen Min<sup>†</sup>, Xiaowei Zhang<sup>†</sup> and

Chanjuan Xi<sup>\*†‡</sup>

<sup>a</sup>Key Laboratory of Bioorganic Phosphorus Chemistry & Chemical Biology (Ministry of Education), Department of Chemistry, Tsinghua University, Beijing 100084, China

<sup>b</sup>State Key Laboratory of Elemento-Organic Chemistry, Nankai University, Tianjin 300071, China

Email: cjxi@tsinghua.edu.cn

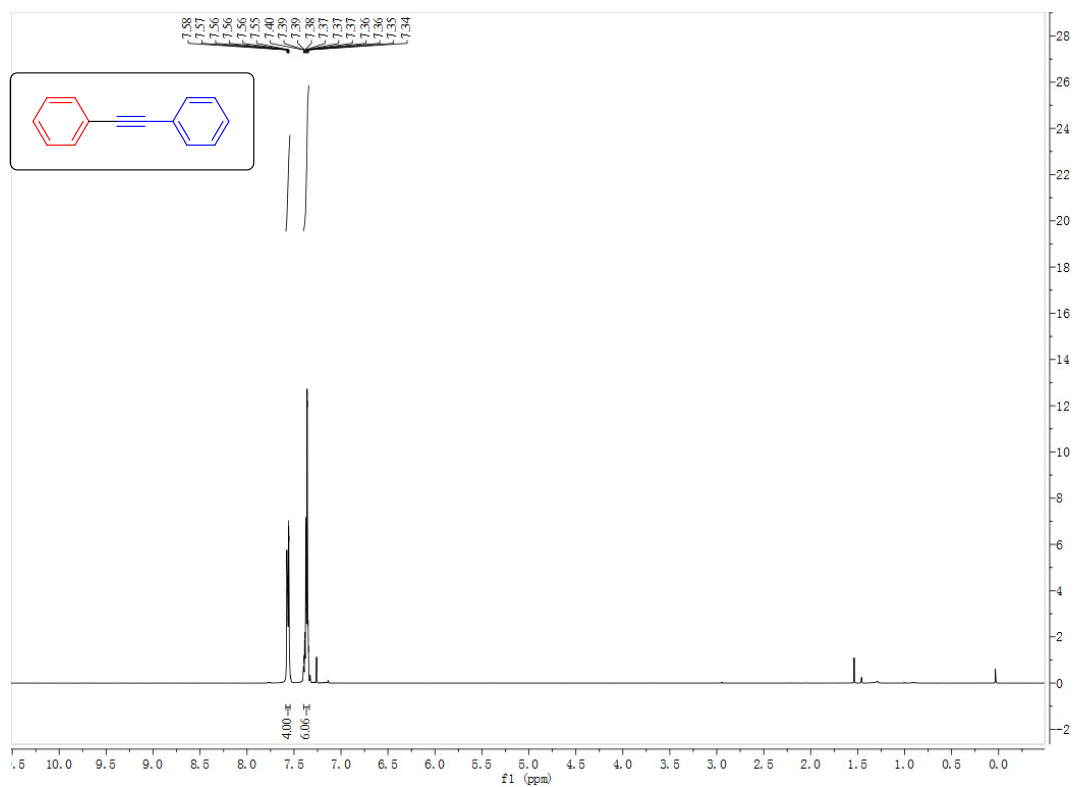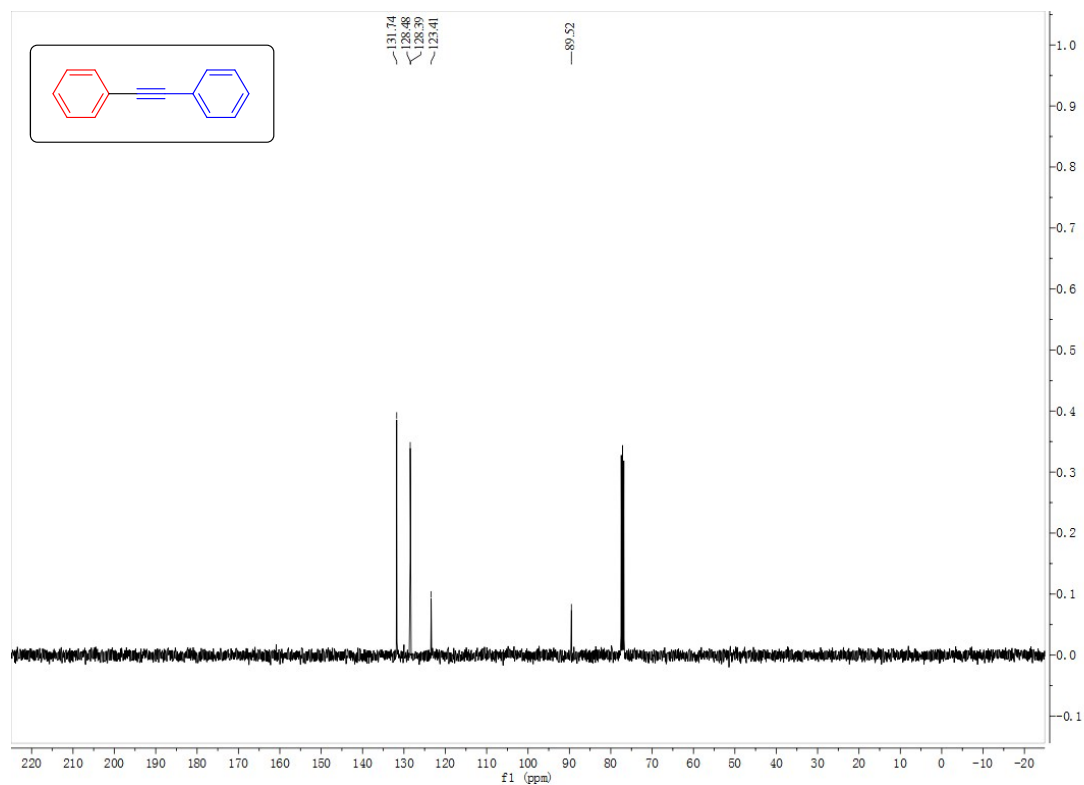

<sup>1</sup>H NMR and <sup>13</sup>C NMR for compound **4aa**

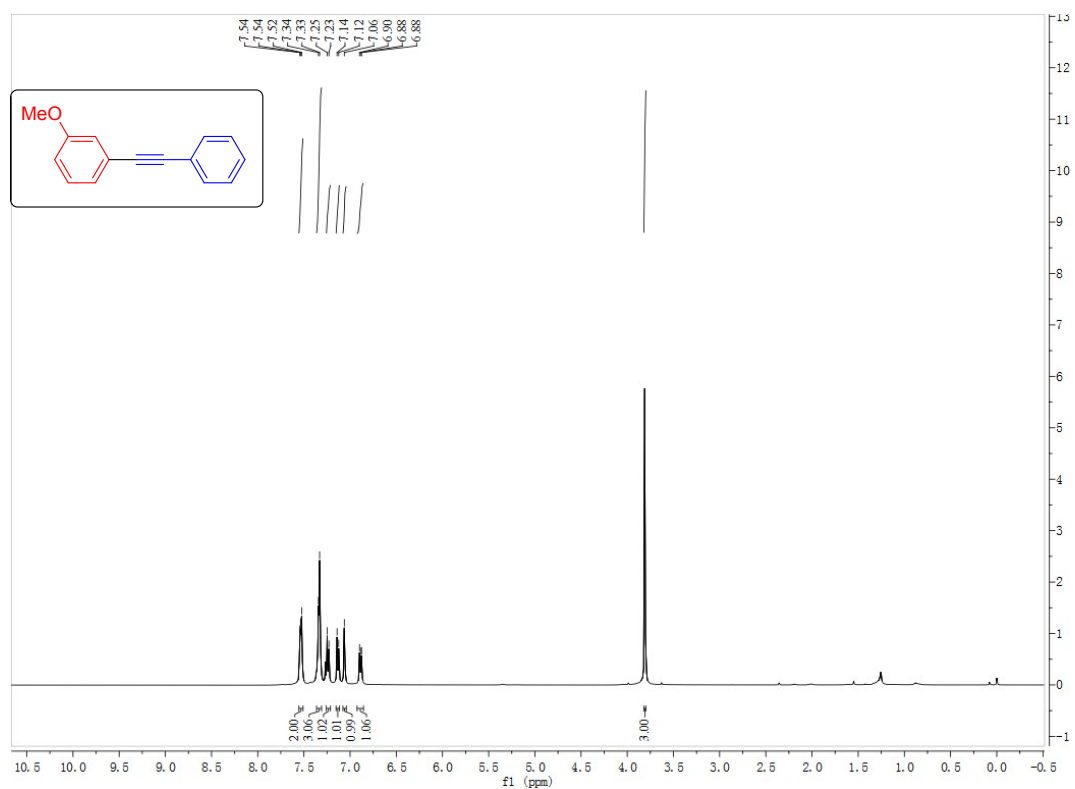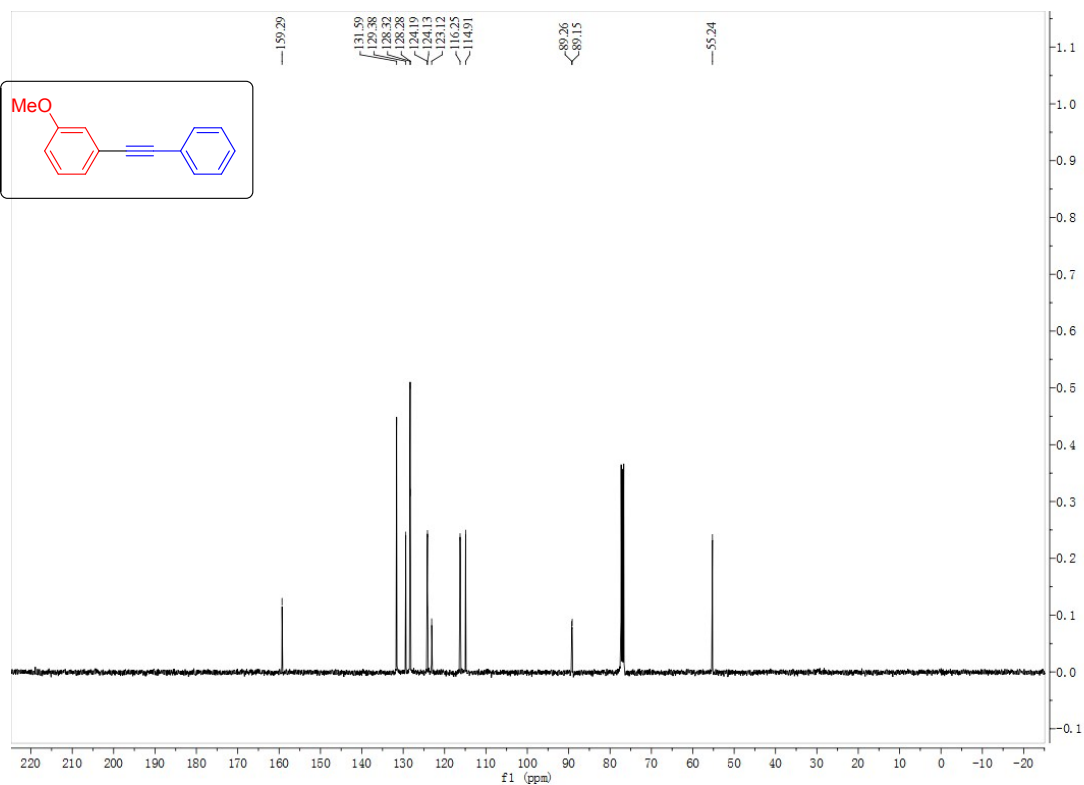

**<sup>1</sup>H NMR and <sup>13</sup>C NMR for compound 4ba**

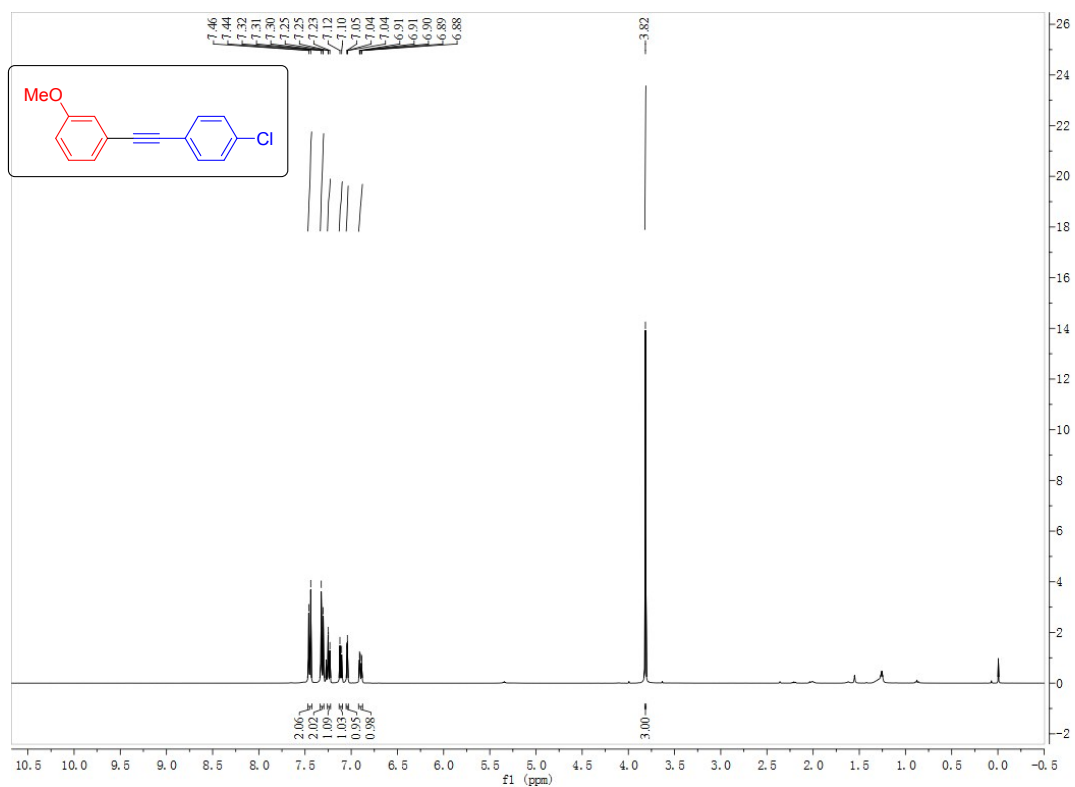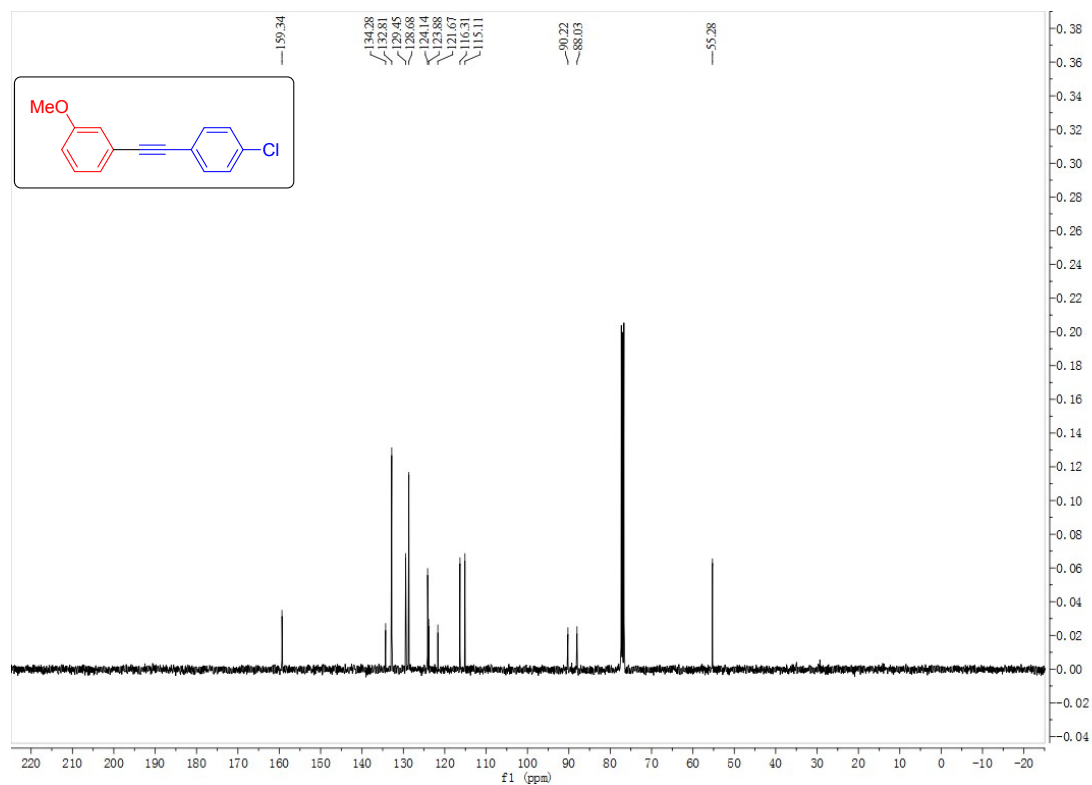

<sup>1</sup>H NMR and <sup>13</sup>C NMR for compound **4bb**

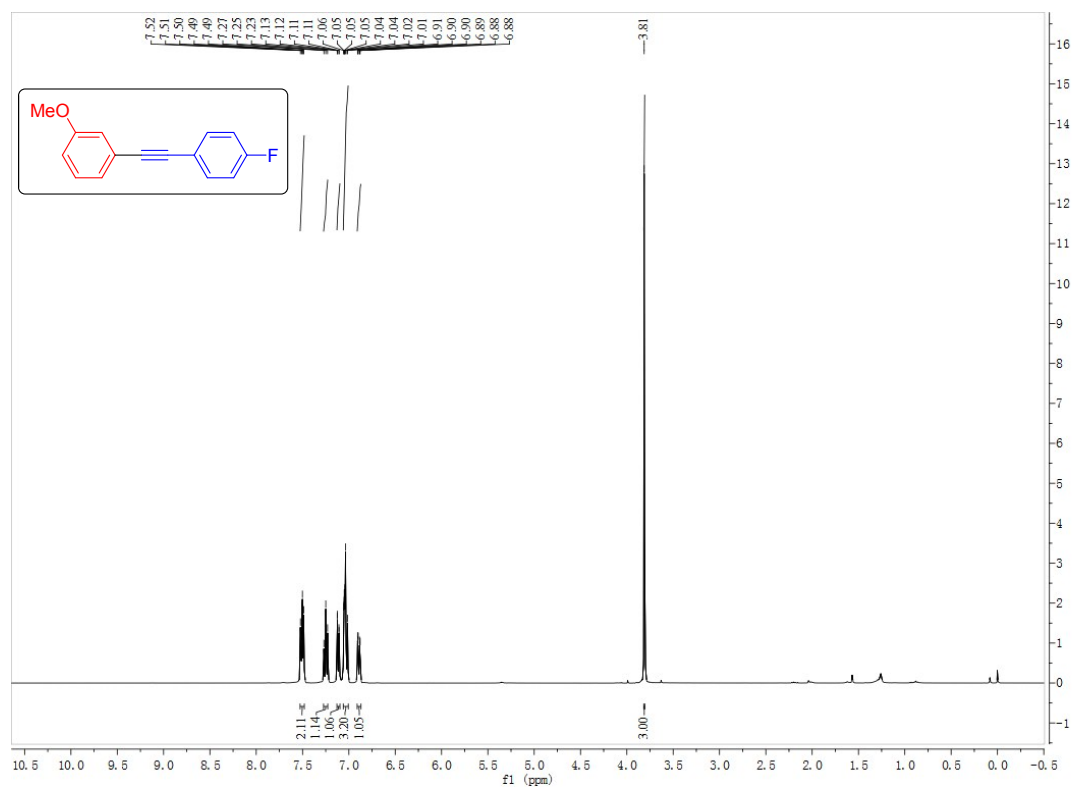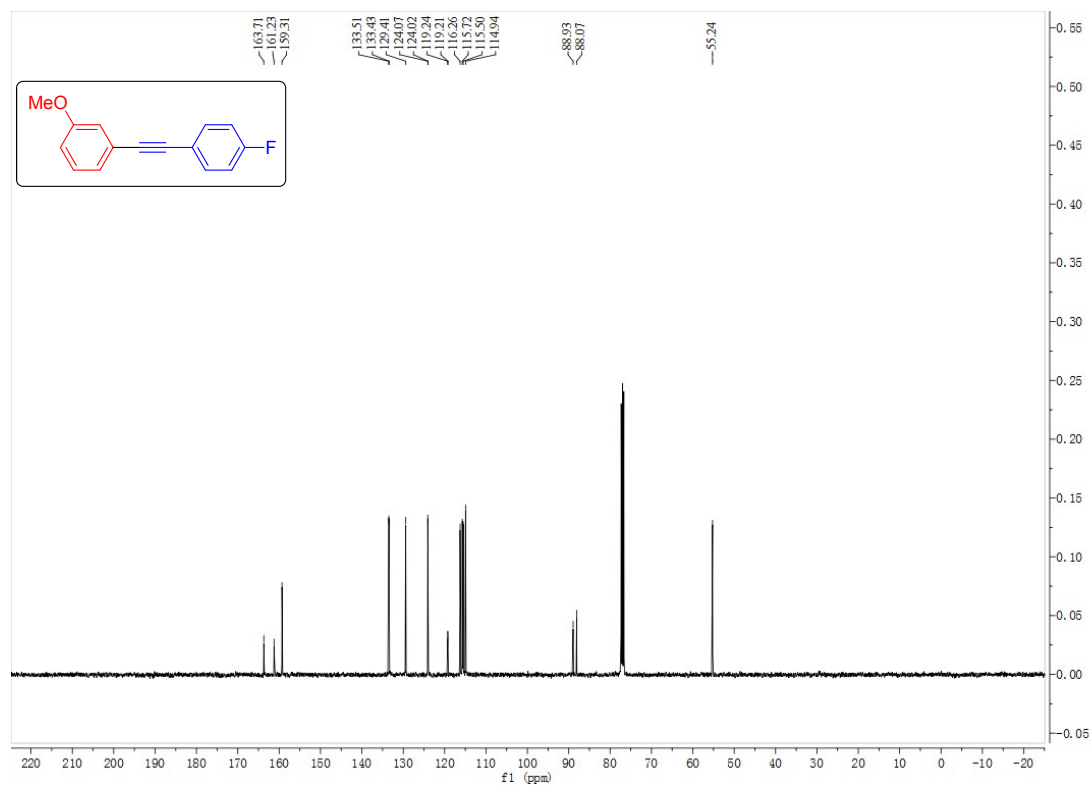

**<sup>1</sup>H NMR and <sup>13</sup>C NMR for compound 4bc**

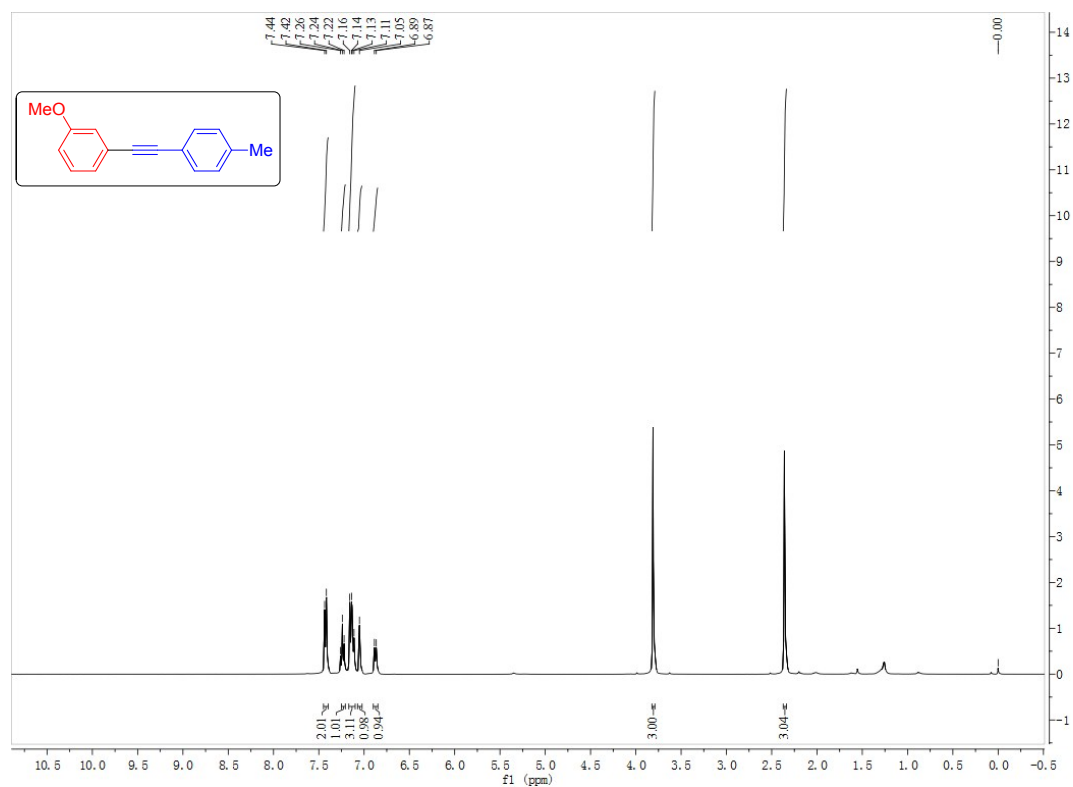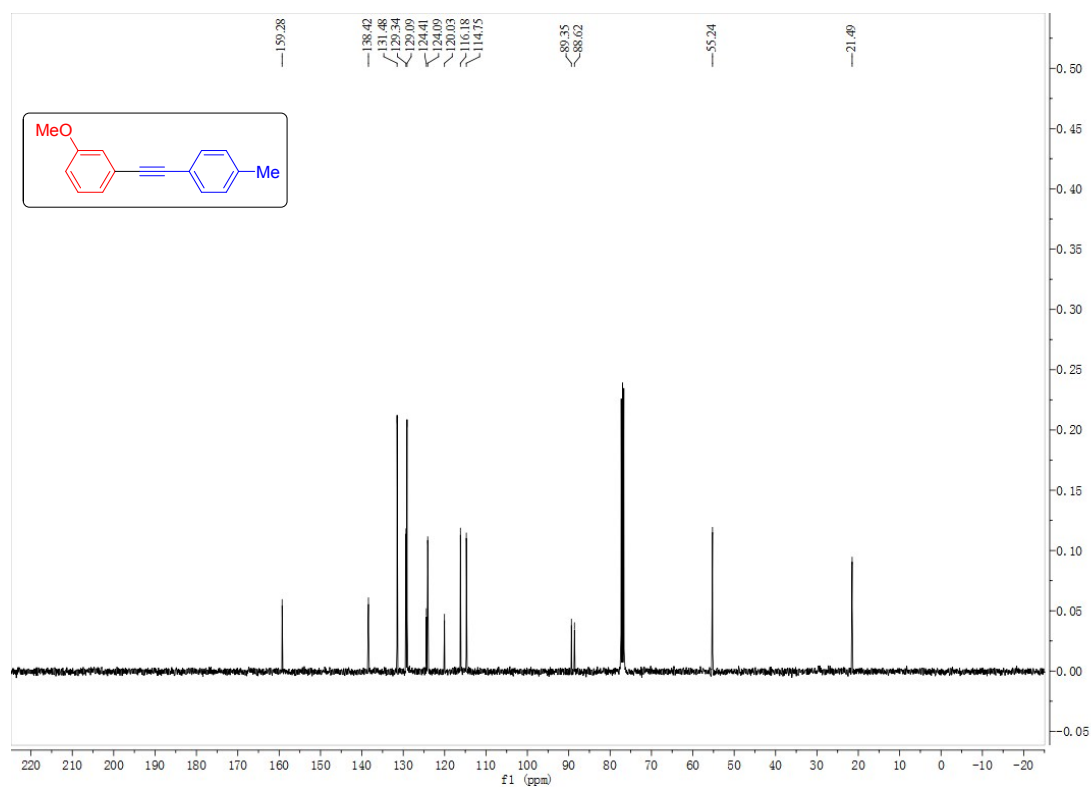

**<sup>1</sup>H NMR and <sup>13</sup>C NMR for compound 4bd**

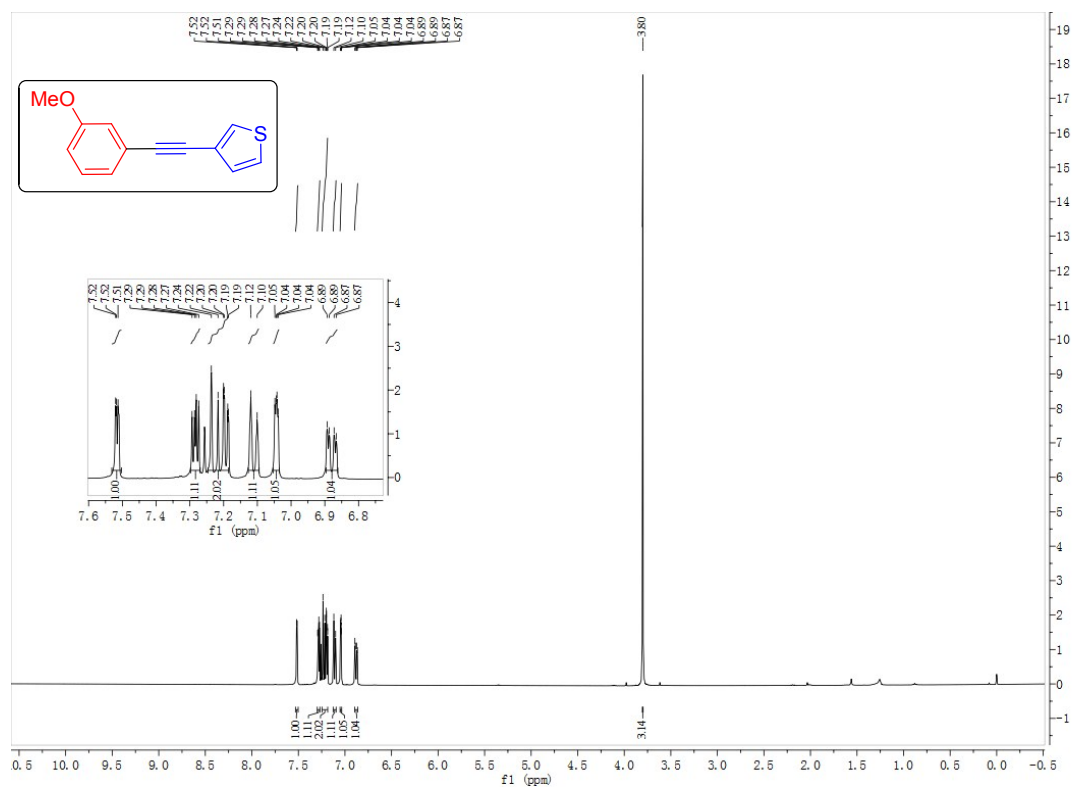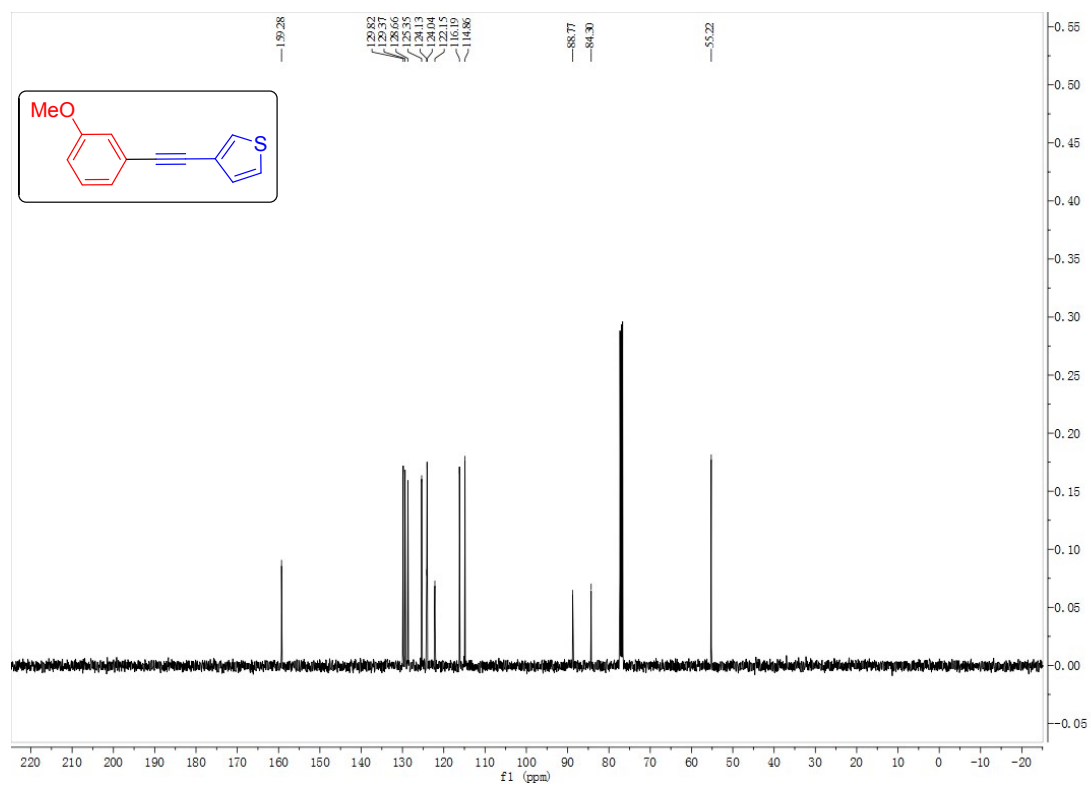

**<sup>1</sup>H NMR and <sup>13</sup>C NMR for compound 4be**

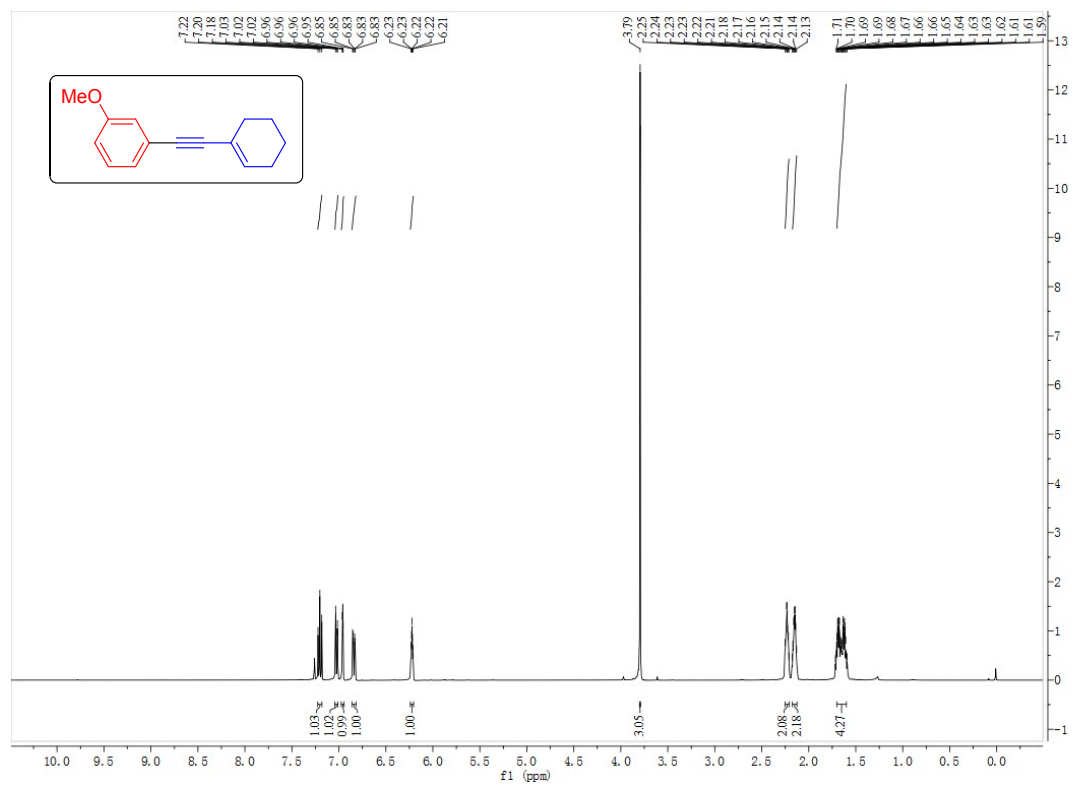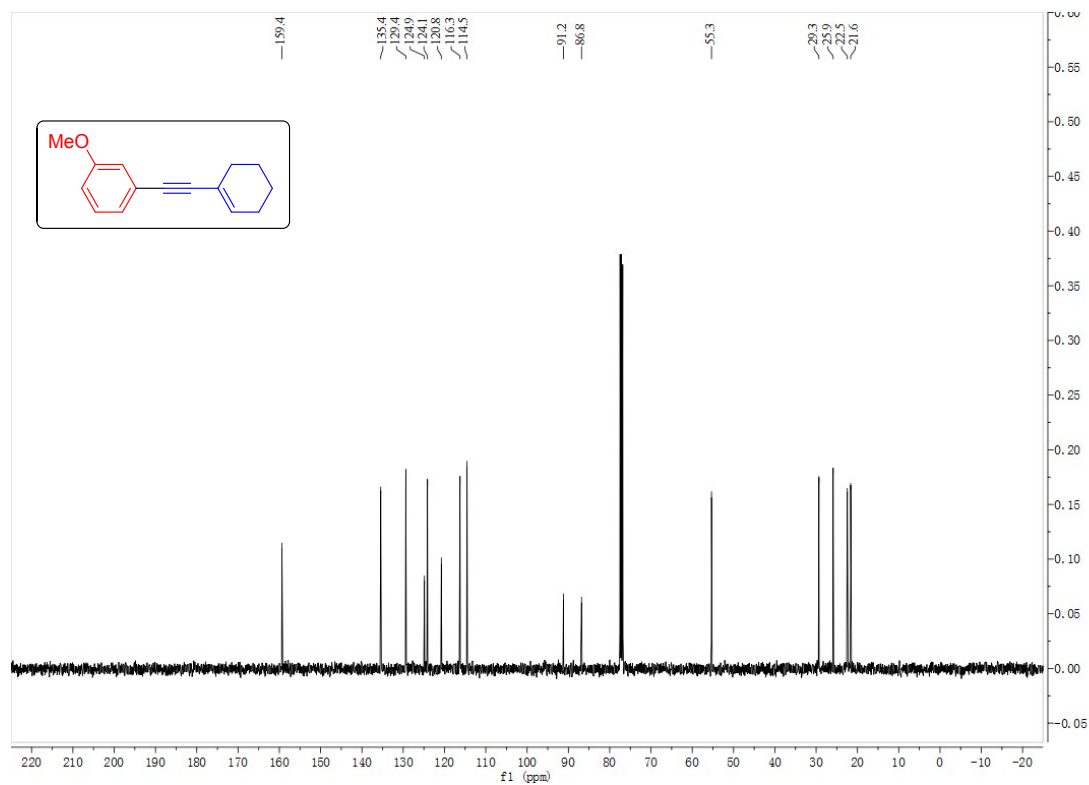

**<sup>1</sup>H NMR and <sup>13</sup>C NMR for compound 4bf**



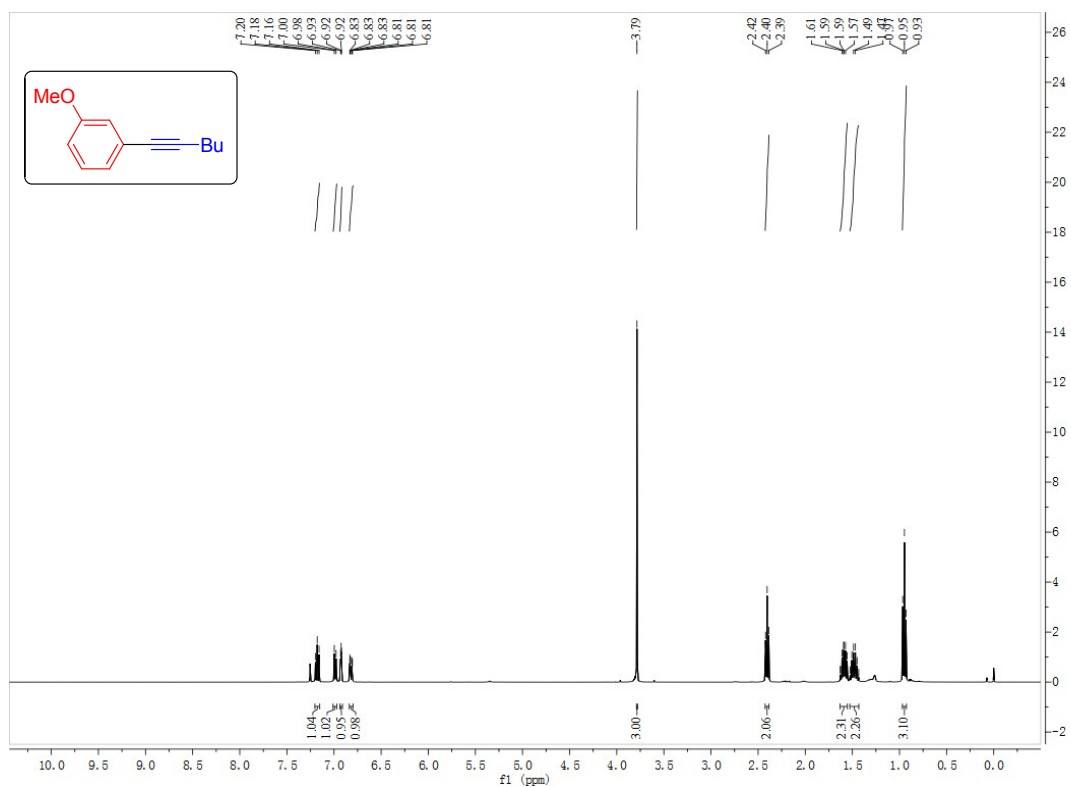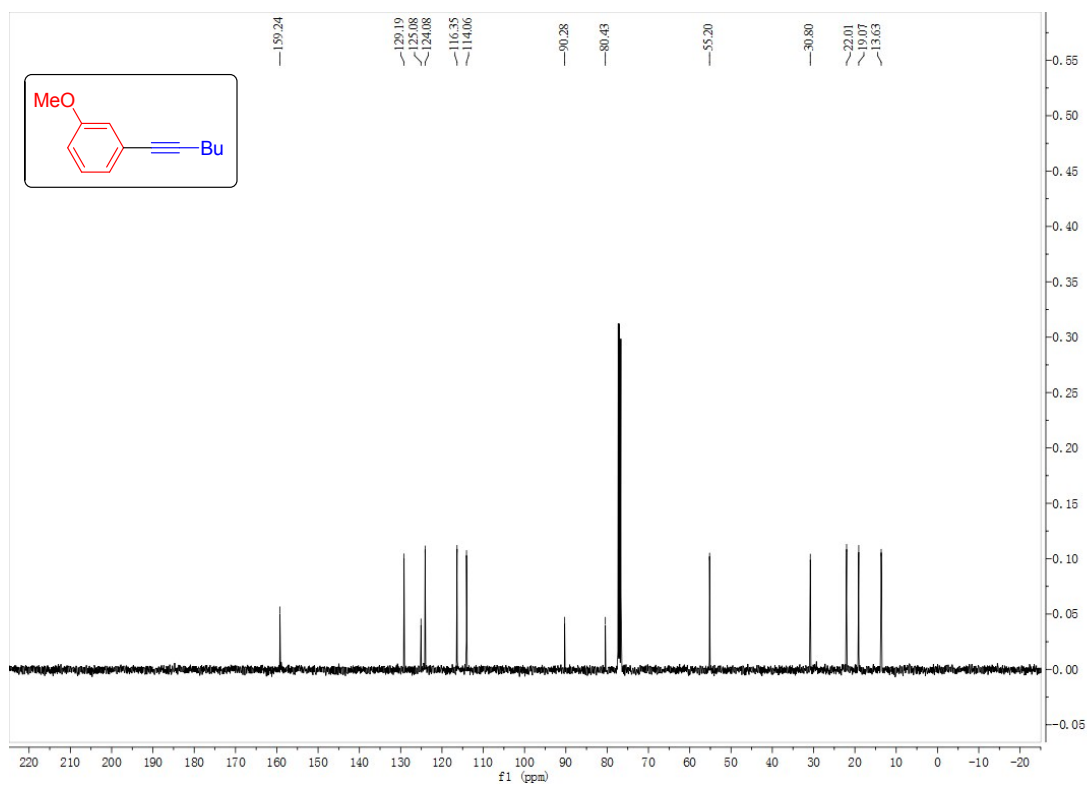

**<sup>1</sup>H NMR and <sup>13</sup>C NMR for compound 4bg**

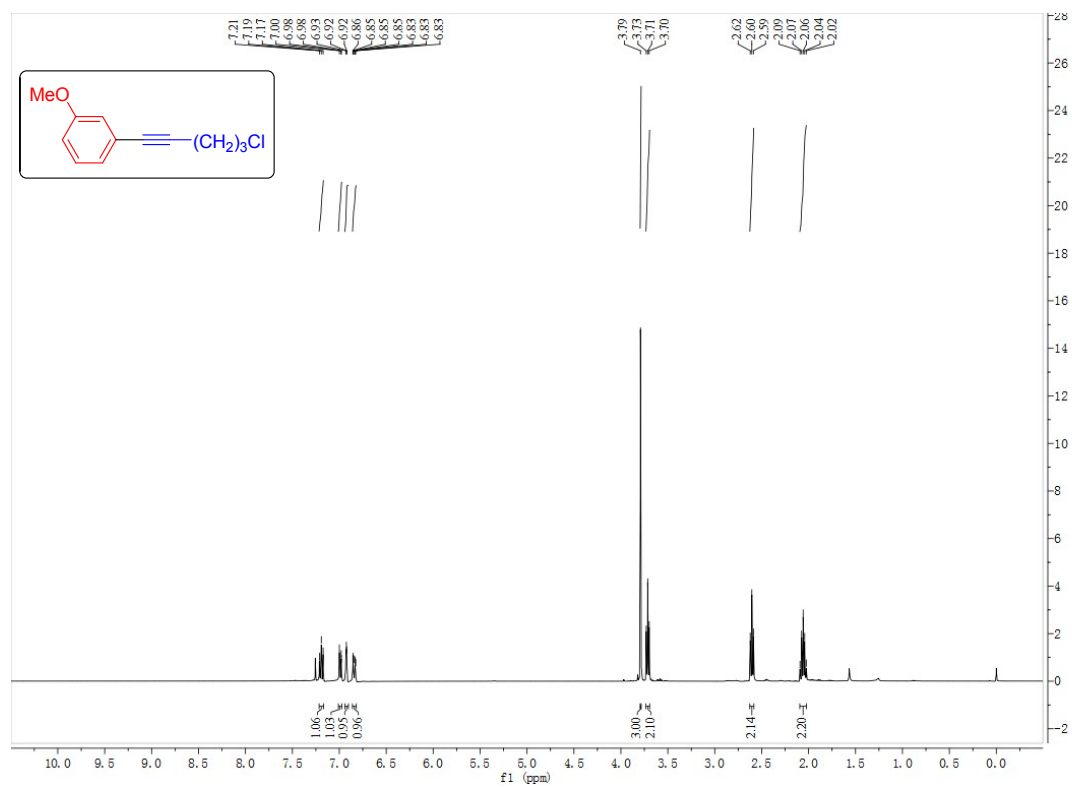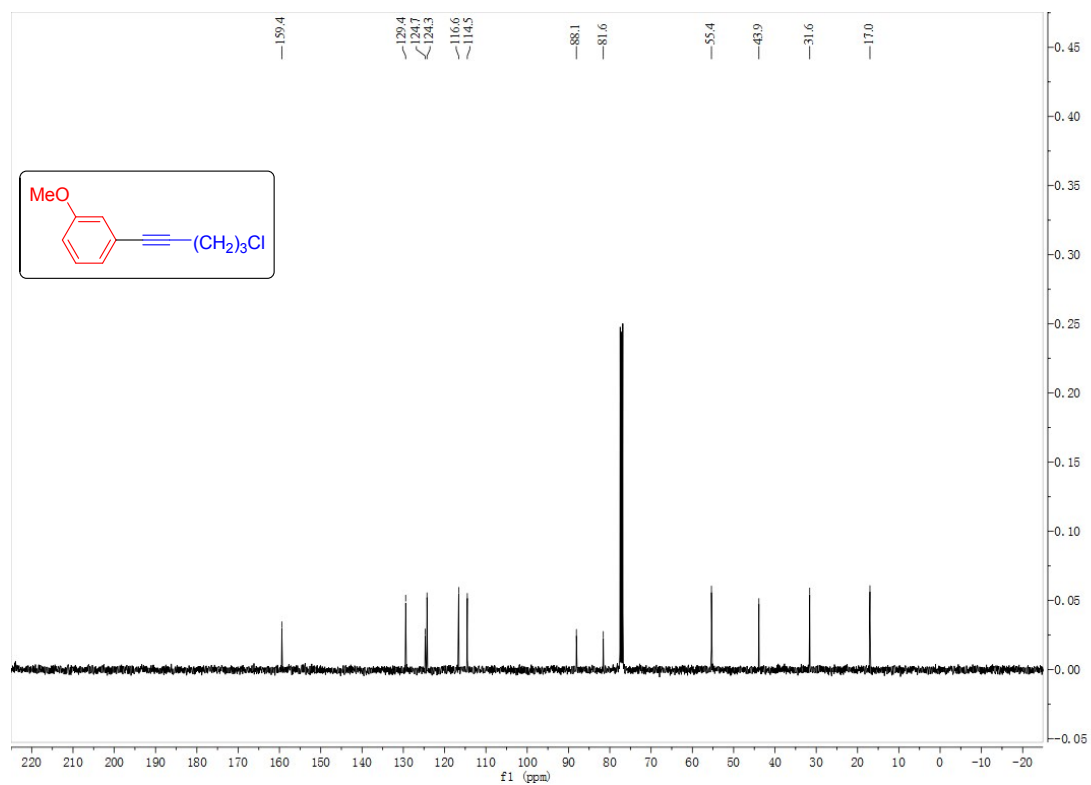

**<sup>1</sup>H NMR and <sup>13</sup>C NMR for compound 4bh**

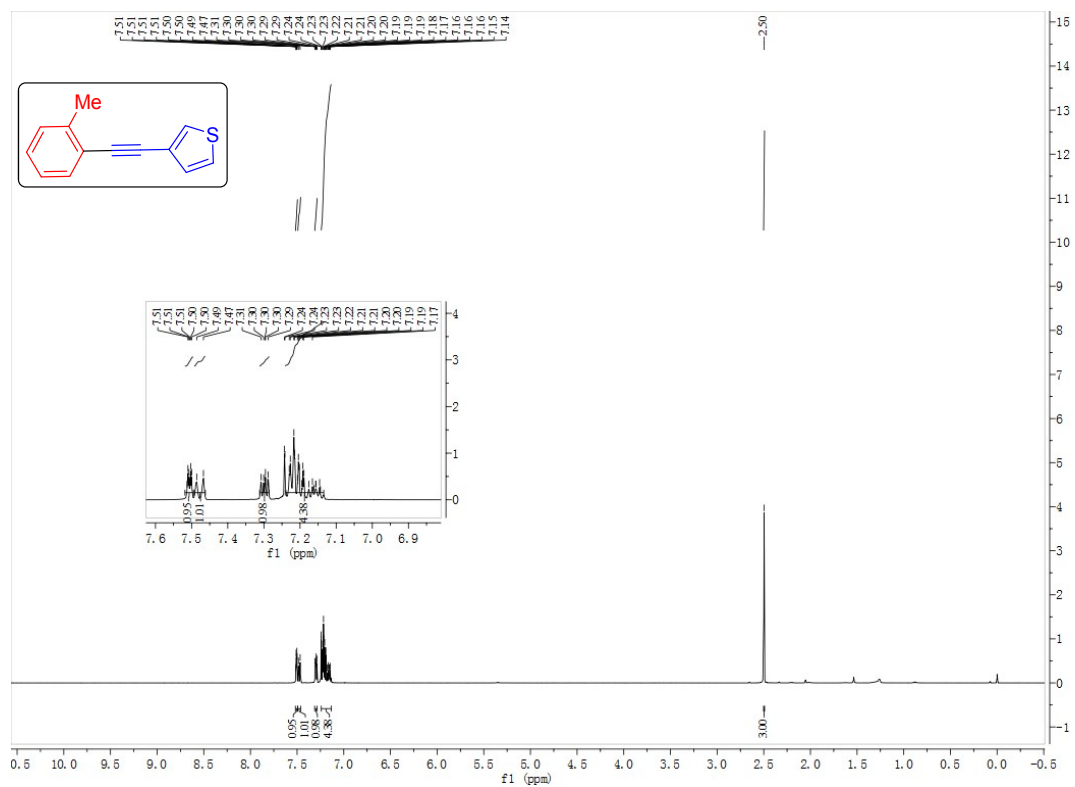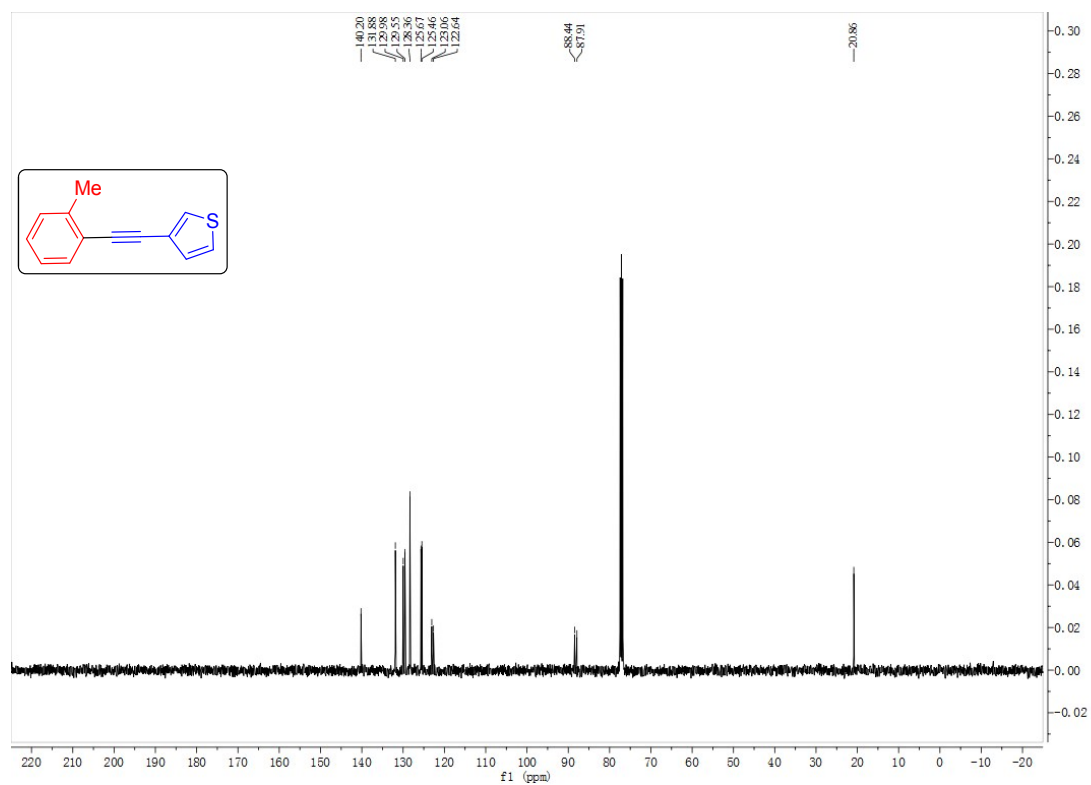

**<sup>1</sup>H NMR and <sup>13</sup>C NMR for compound 4ce**

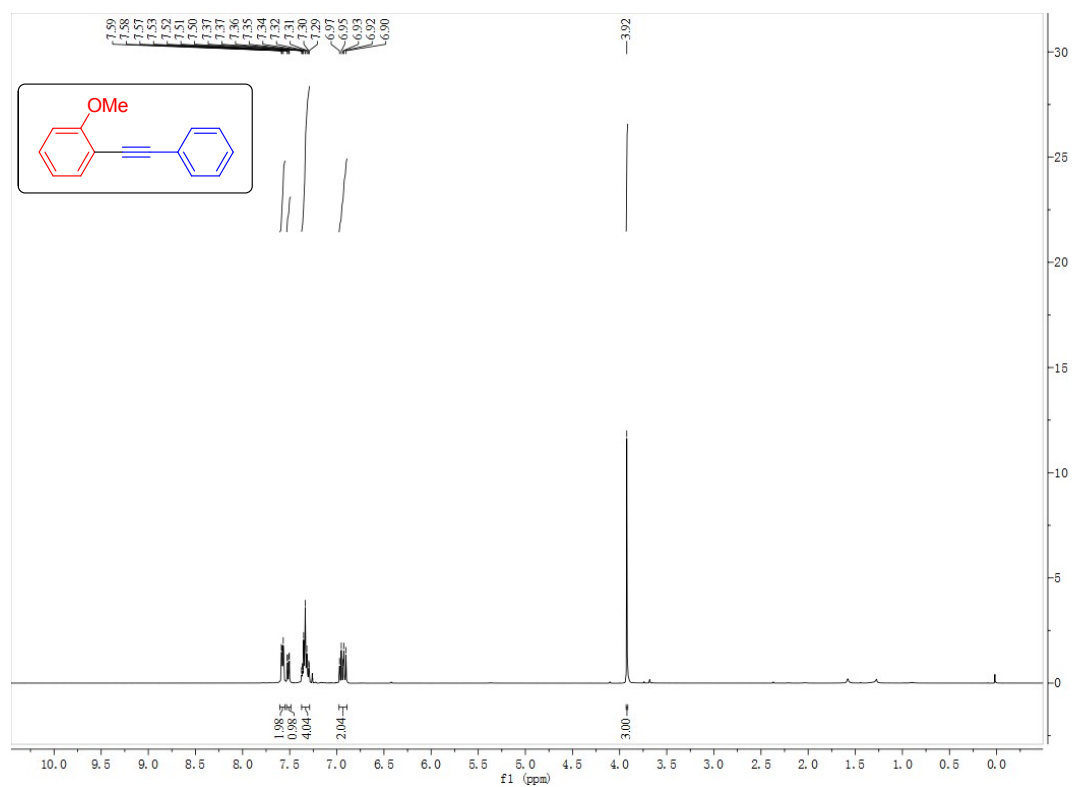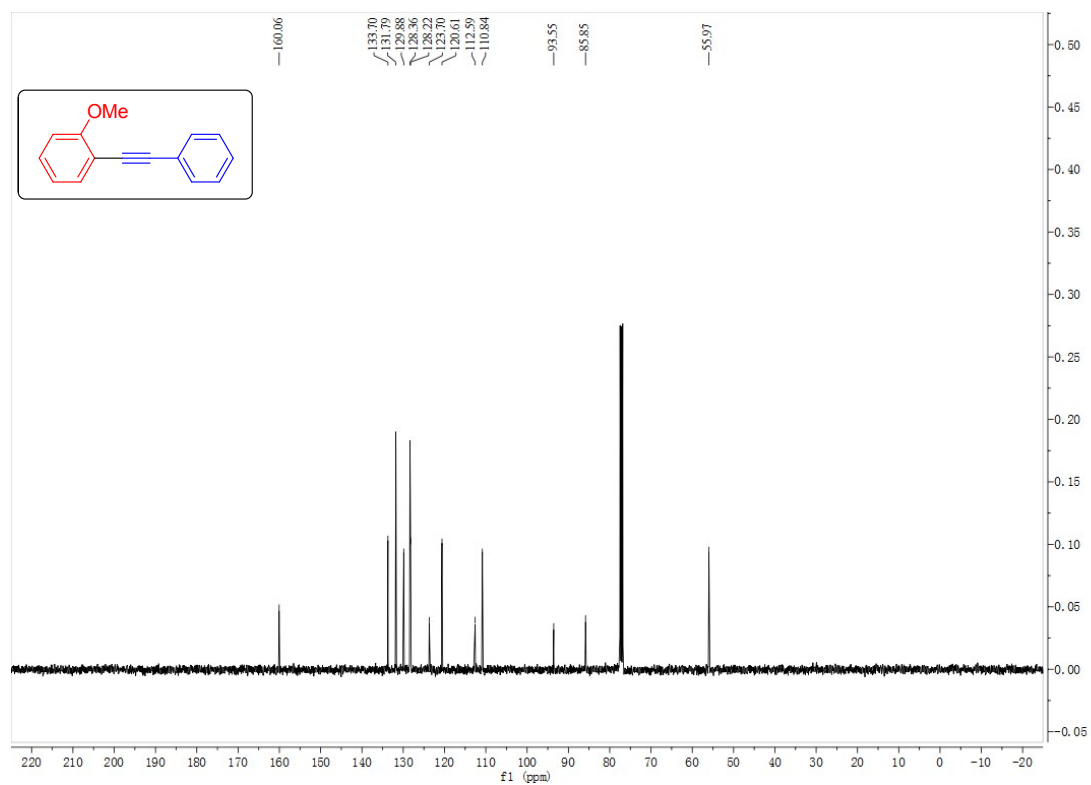

<sup>1</sup>H NMR and <sup>13</sup>C NMR for compound **4da**

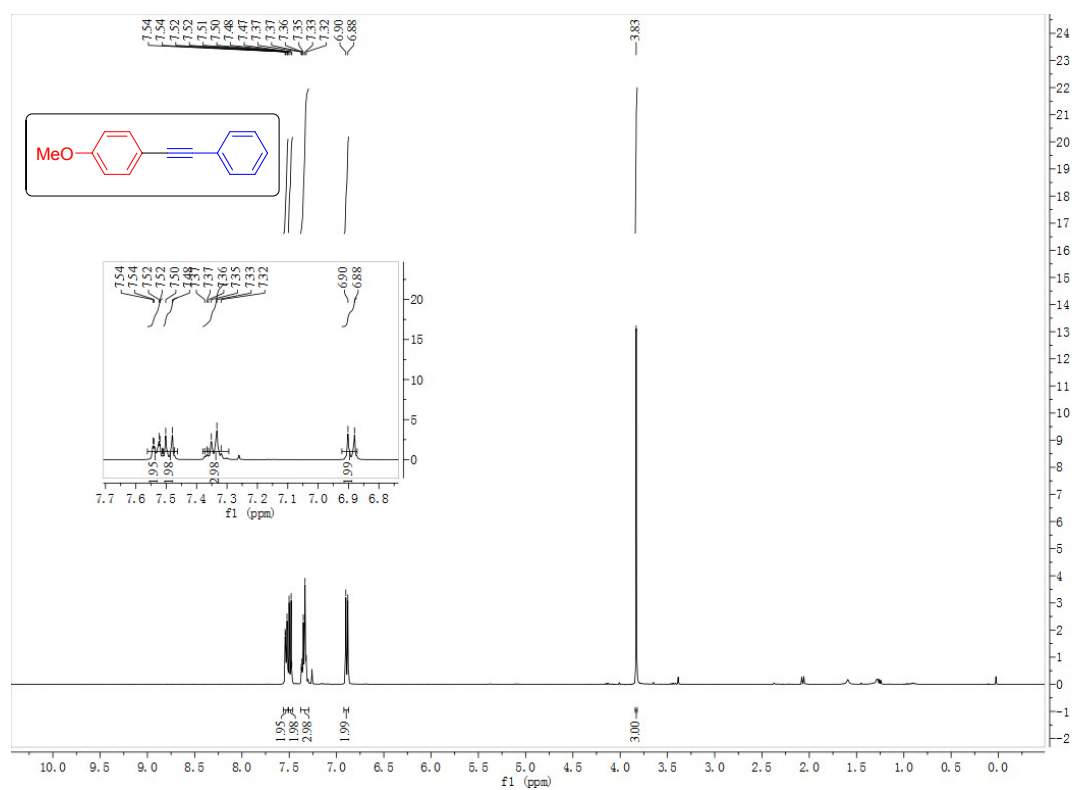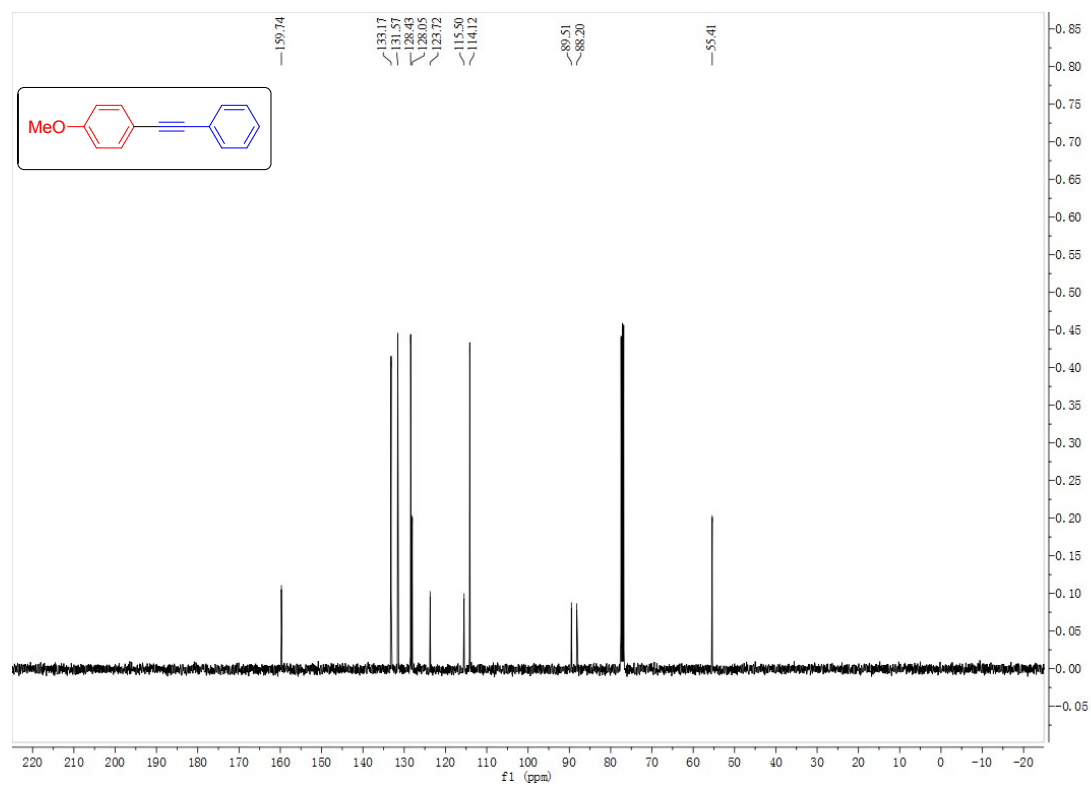

**<sup>1</sup>H NMR and <sup>13</sup>C NMR for compound 4ea**

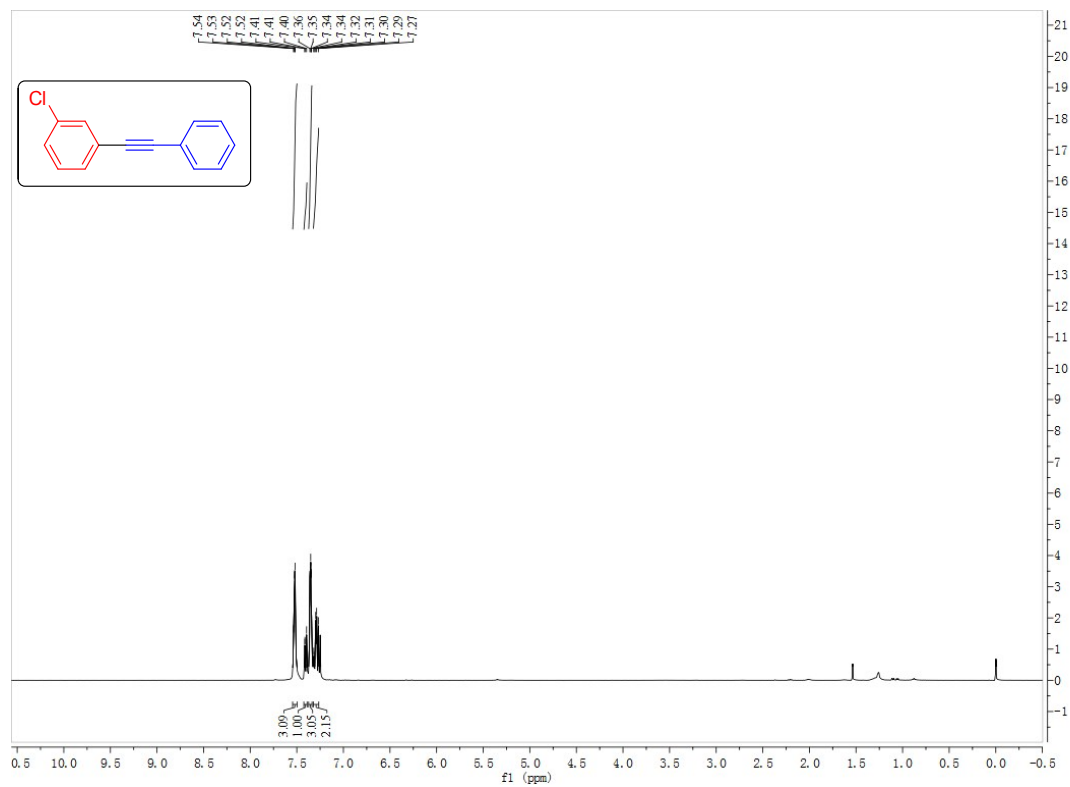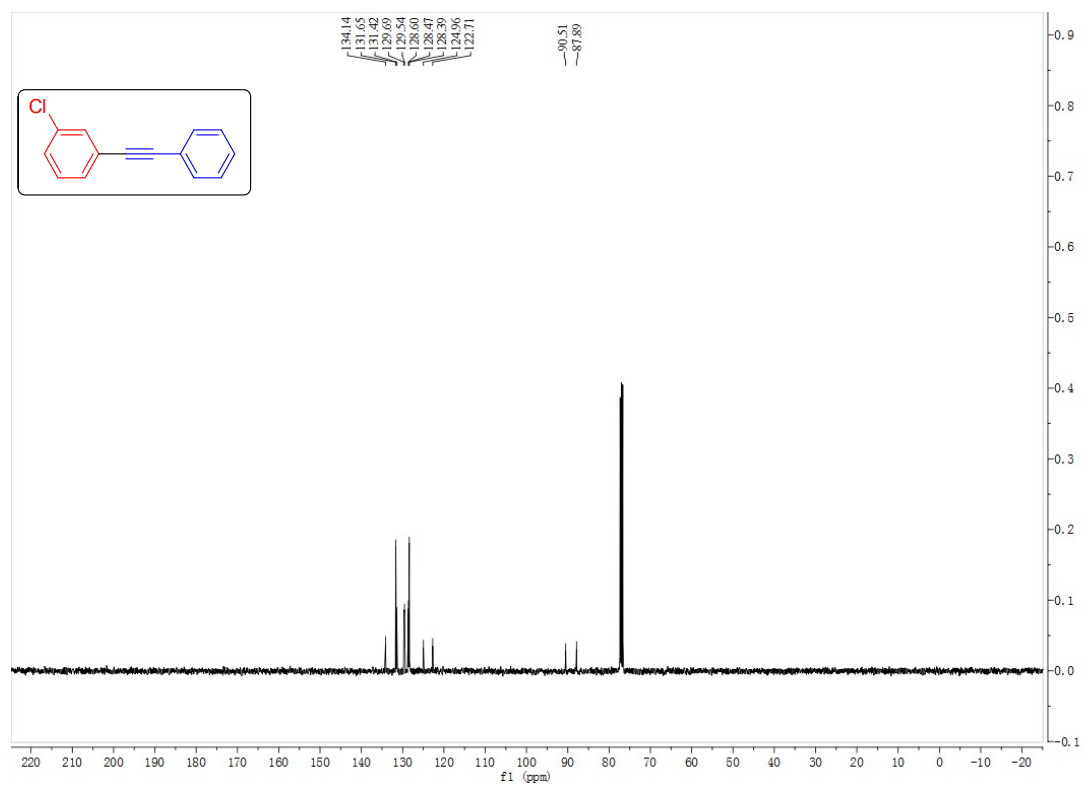

<sup>1</sup>H NMR and <sup>13</sup>C NMR for compound **4fa**

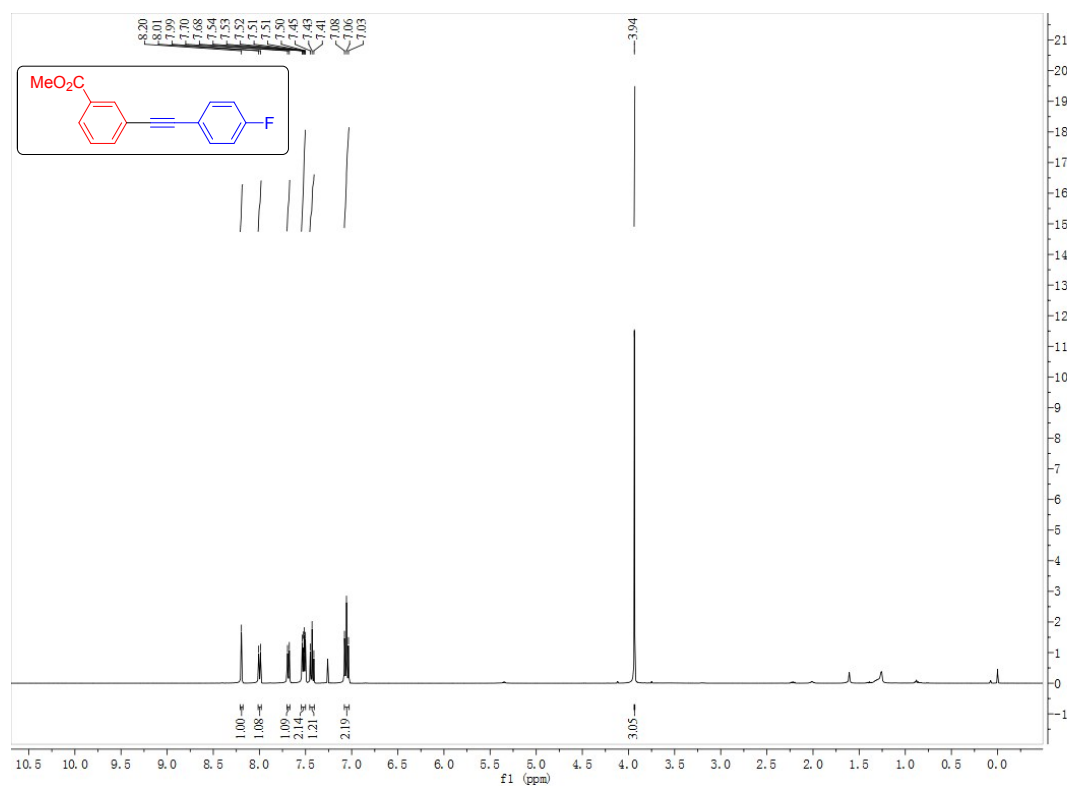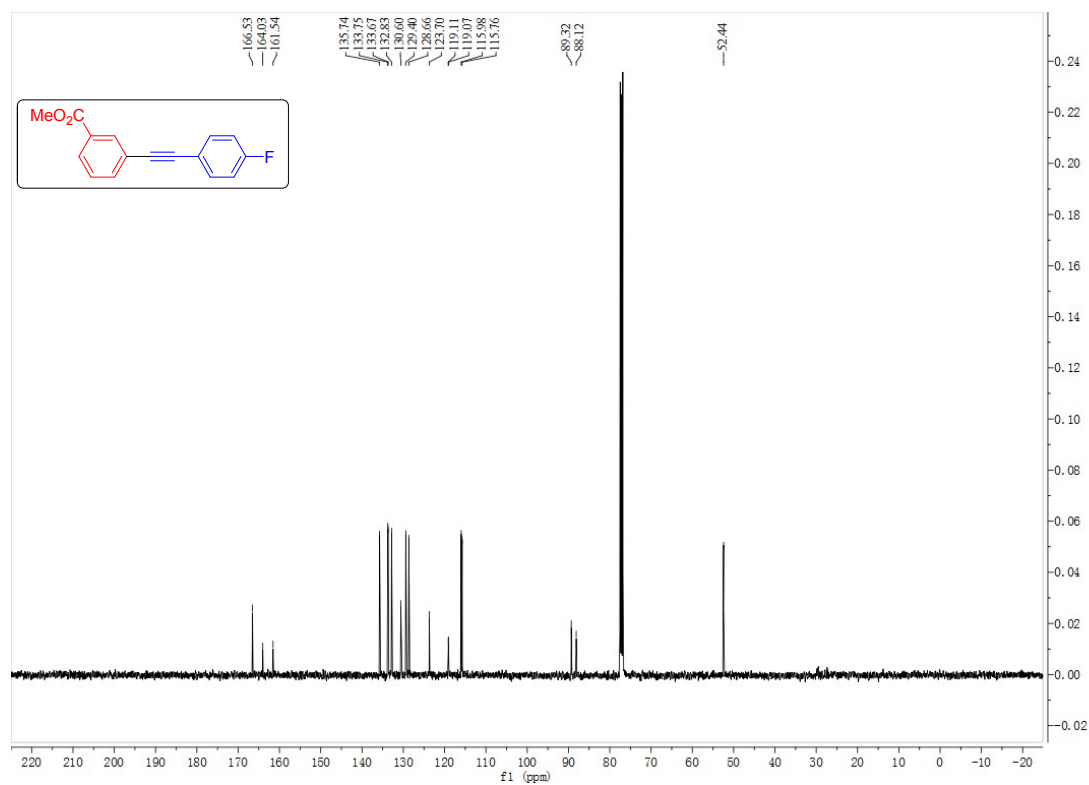

<sup>1</sup>H NMR and <sup>13</sup>C NMR for compound **4gc**

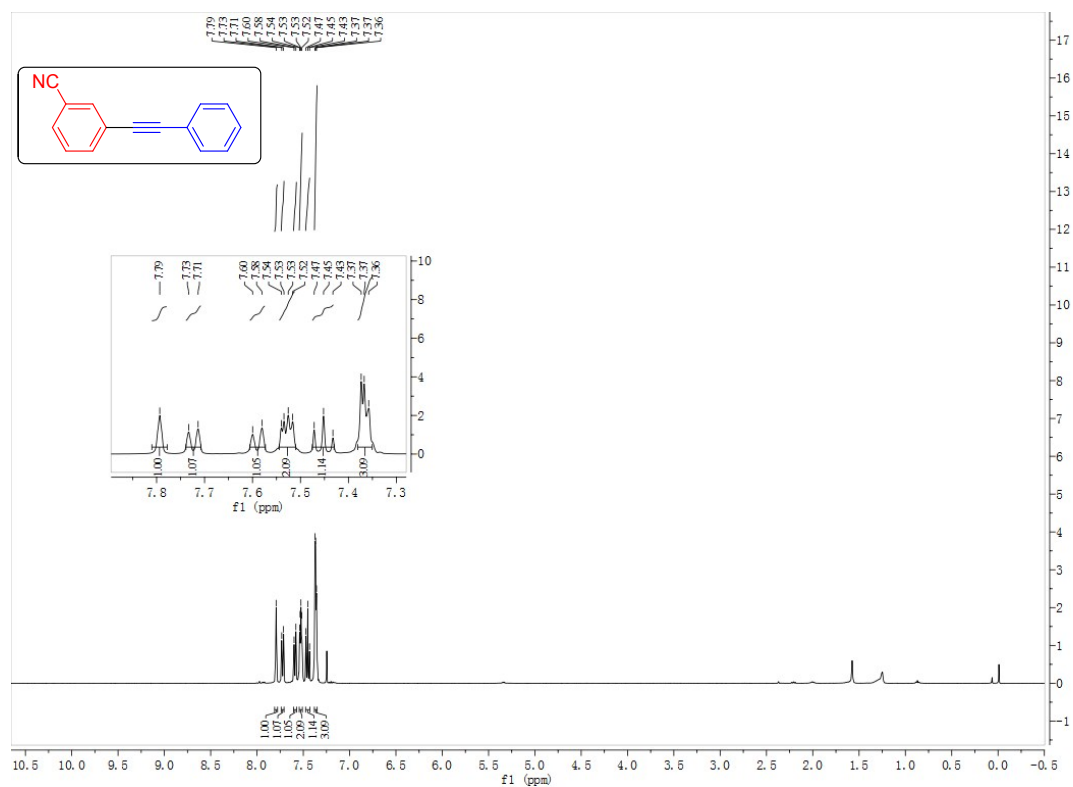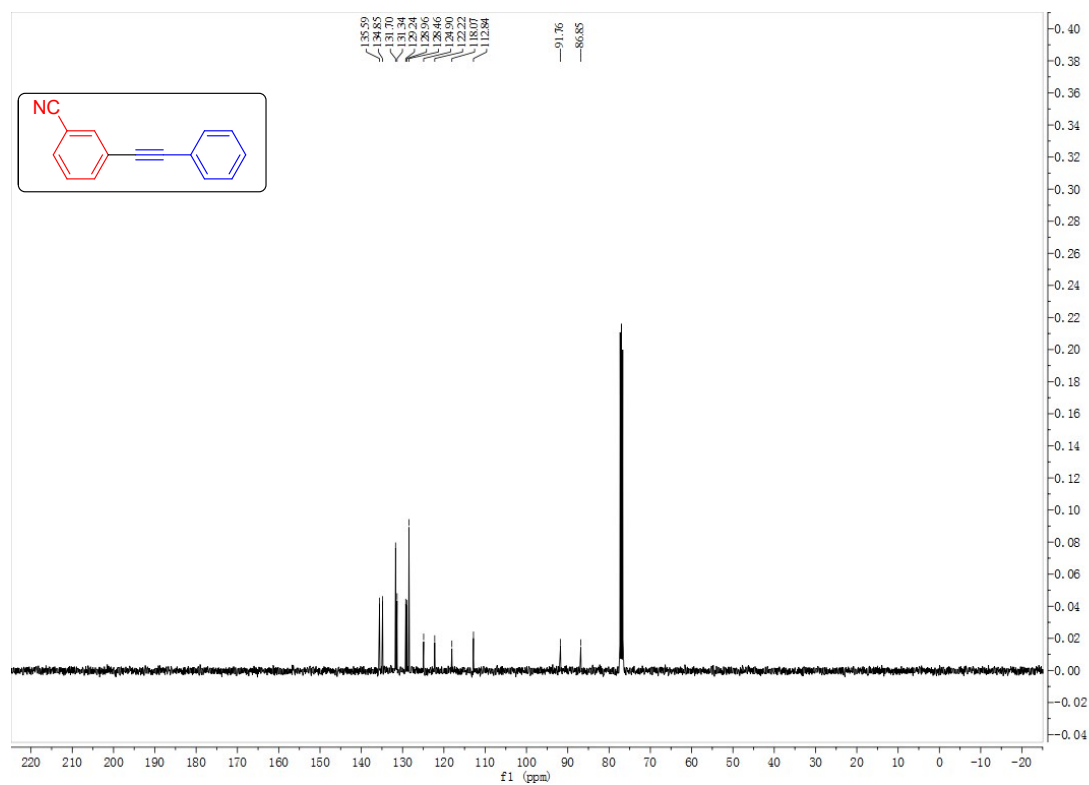

**<sup>1</sup>H NMR and <sup>13</sup>C NMR for compound 4ha**



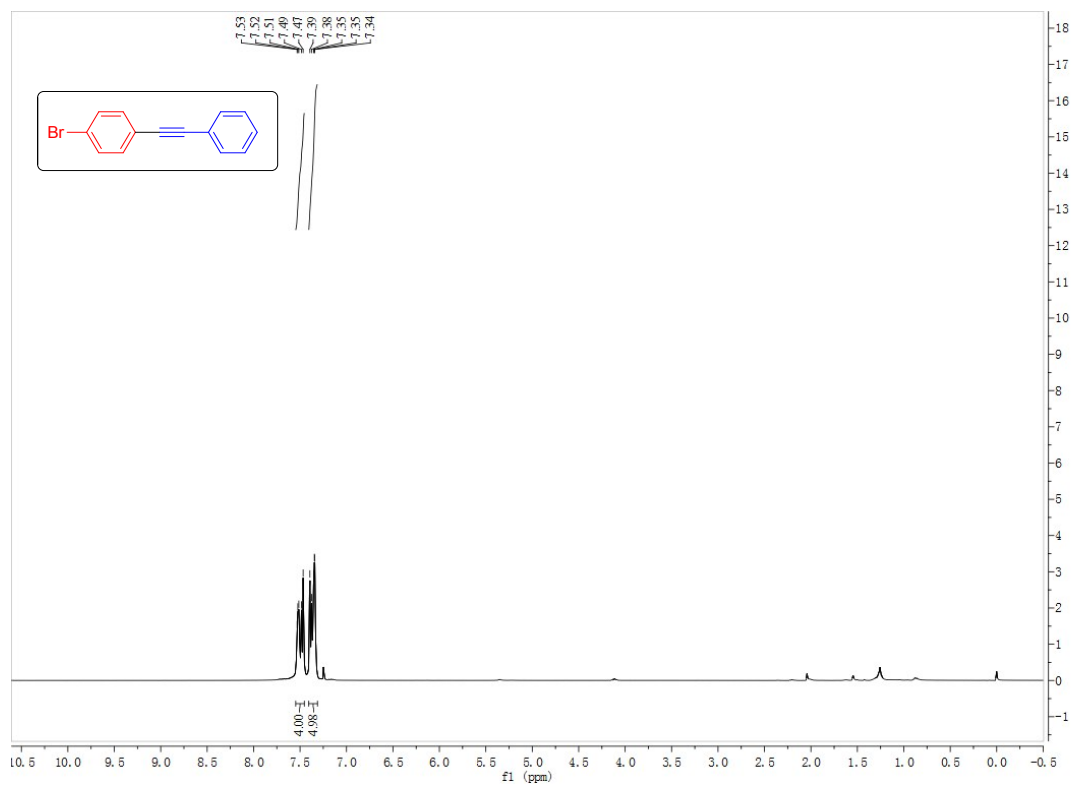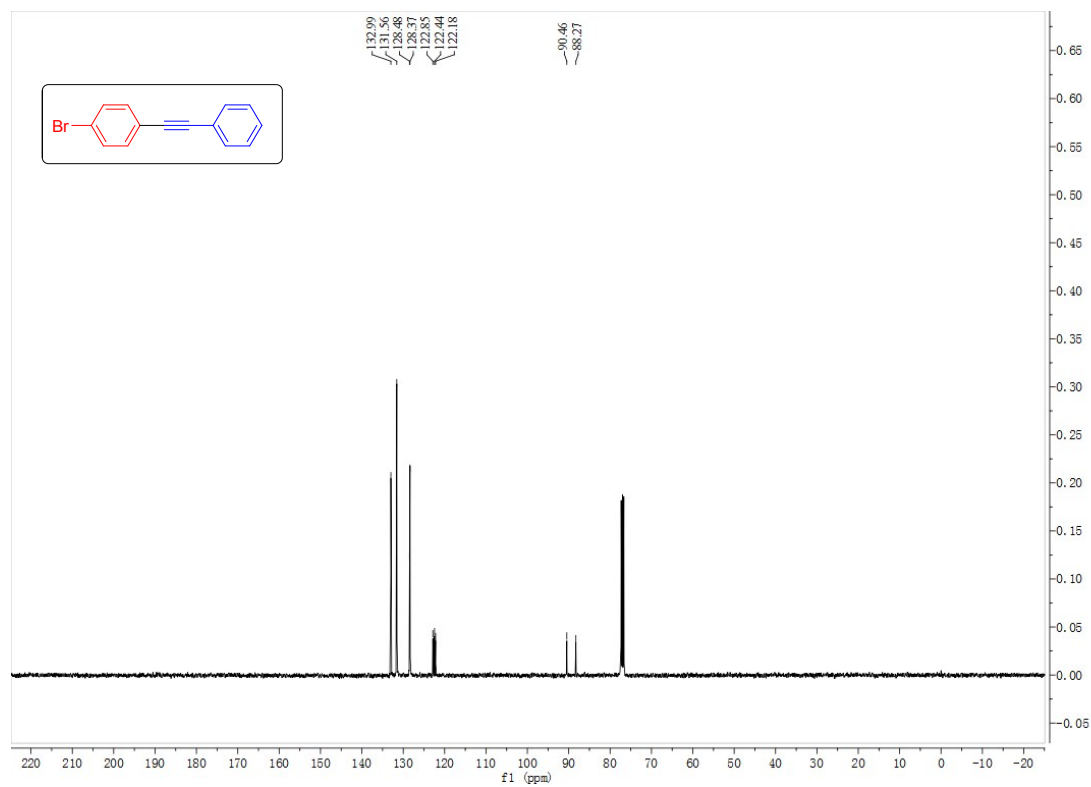

<sup>1</sup>H NMR and <sup>13</sup>C NMR for compound **4ia**

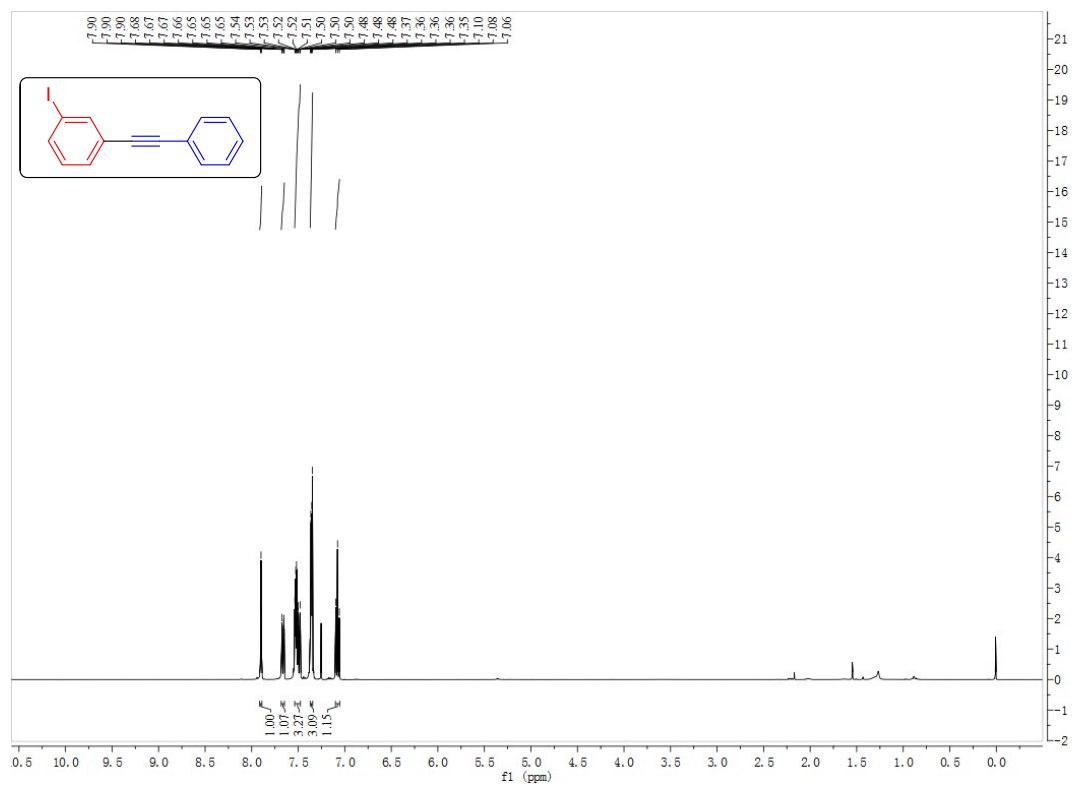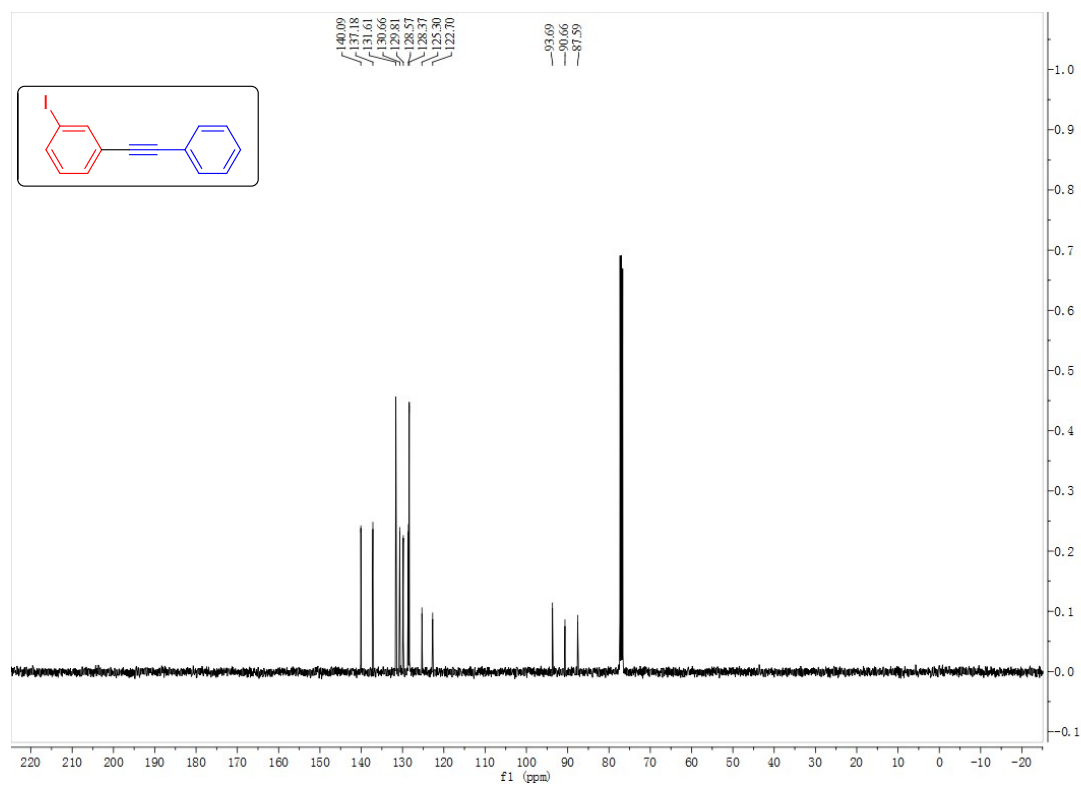

<sup>1</sup>H NMR and <sup>13</sup>C NMR for compound 4ja

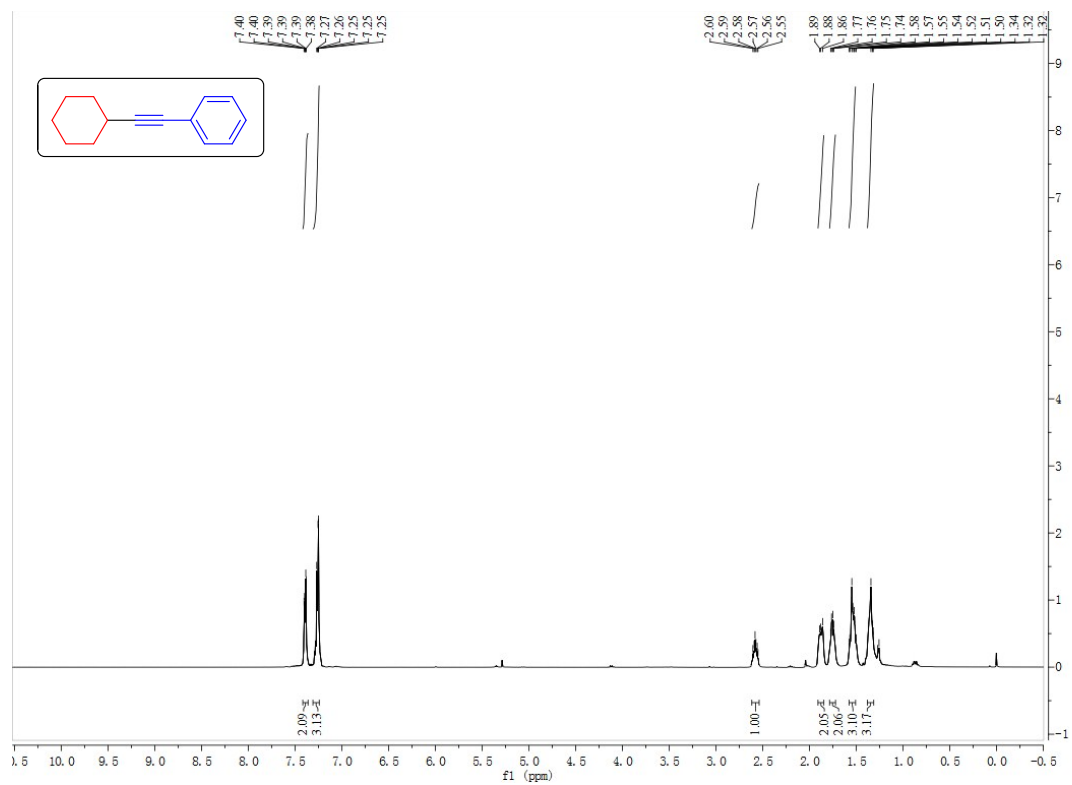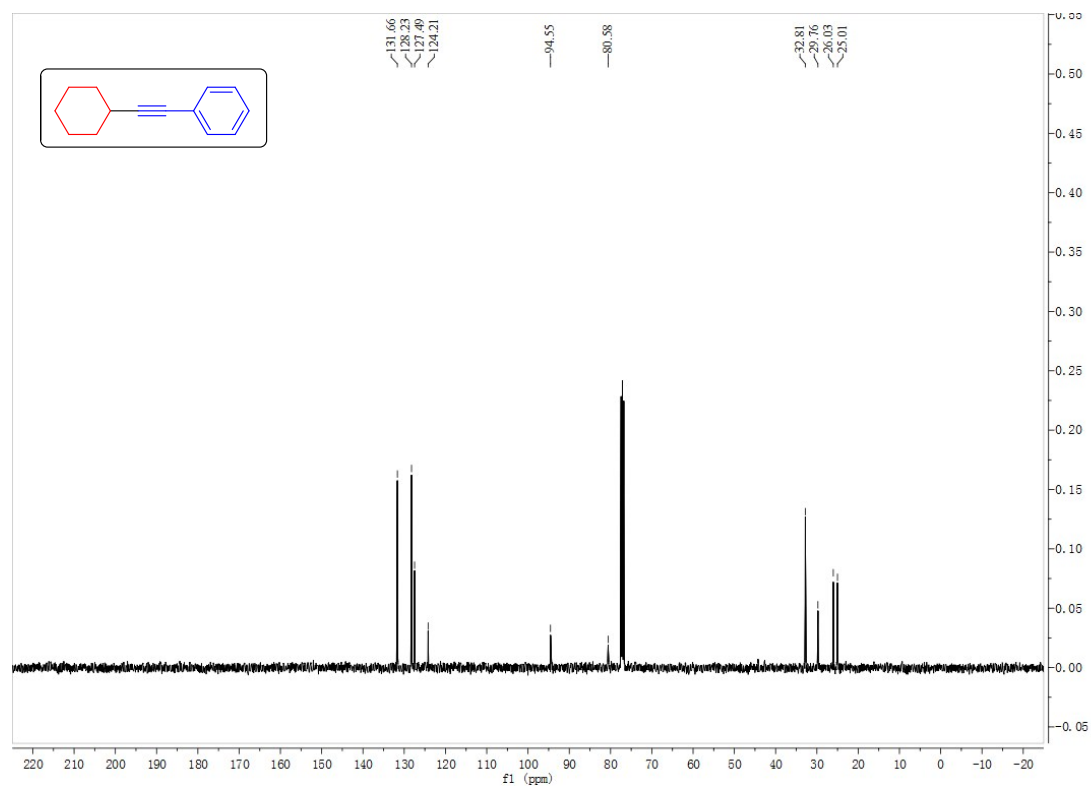

**<sup>1</sup>H NMR and <sup>13</sup>C NMR for compound 4ka**
